# Supplementary material
Source: HighWire-hosted journal article supplement (https://bmjopenquality.bmj.com/highwire/filestream/135901/field_highwire_adjunct_files/1/ds6682.docx)
Supplement: ds6682.docx [file ds6682.docx]

**Table 1. Mean Number of Missing Items Recorded**

| **Measurement Time** | **Mean number of missing items** | **Mann-Whitney-U** |
| --- | --- | --- |
| Initial | 8.8 (range 0-23) |  |
| Post PDSA Cycle 3  (Single Theatre) | 1.1* (0-24) | p<0.001 |
| One Year Post PDSA Cycle 3  (Widespread Implementation) | 3.8* (0-21) | p<0.001 |
| Post PDSA Cycle 4  (Modified Pro-Forma) | 0.7* (0-15) | p<0.001 |

PDSA Cycle 1 and 2 involved testing and refining the pro-forma prior to widespread implementation

n=30

* = statistically significant change from previous measurement

**Table 2. Knee Arthroscopy Operative Note Pro-Forma Survey**

|  | Strongly Agree | Agree | Neither Agree nor Disagree | Disagree | Strongly Disagree |
| --- | --- | --- | --- | --- | --- |
| Clearer | 80% (8/10) | 20%  (2/10) | 0 | 0 | 0 |
| More Legible | 90%  (9/10) | 10%  (1/10) | 0 | 0 | 0 |
| More Understandable | 90%  (9/10) | 10%  (1/10) | 0 | 0 | 0 |
| More Information Recorded | 50%  (5/10) | 50%  (5/10) | 0 | 0 | 0 |
| Improvement from Free Hand Notes | 100%  (10/10) | 0 | 0 | 0 | 0 |

There were a total of 10 responses received from the 15 members of staff surveyed. The staff survey was conducted after PDSA Cycle 4.
